# Supplementary material
Source: Springer Nature journal article supplement (https://www.springermedizin.de/resource/supplementary/13075_2012_3620_MOESM4_ESM.pdf/9694946)

**A**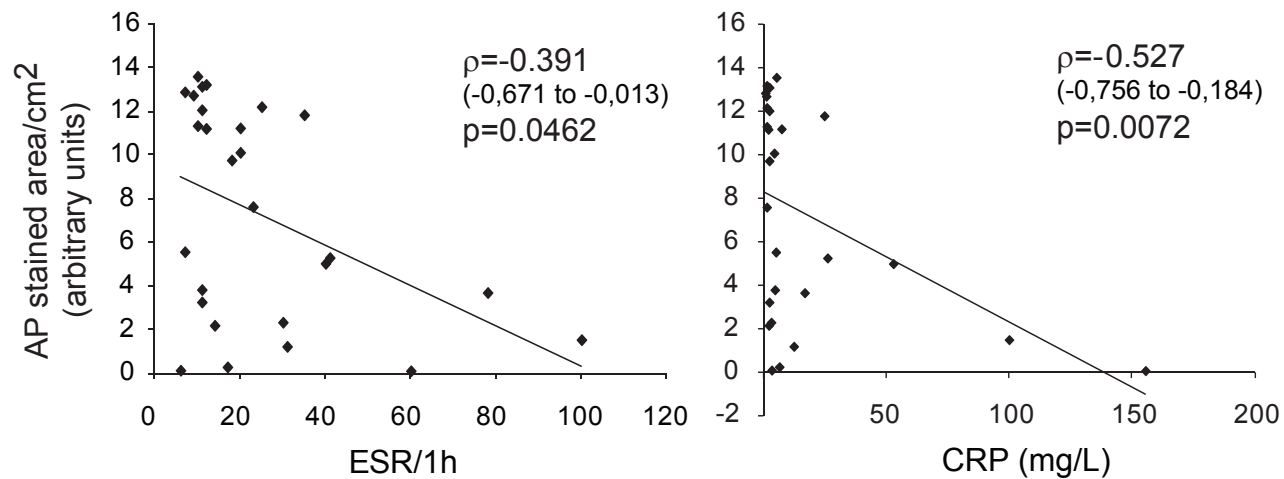**B**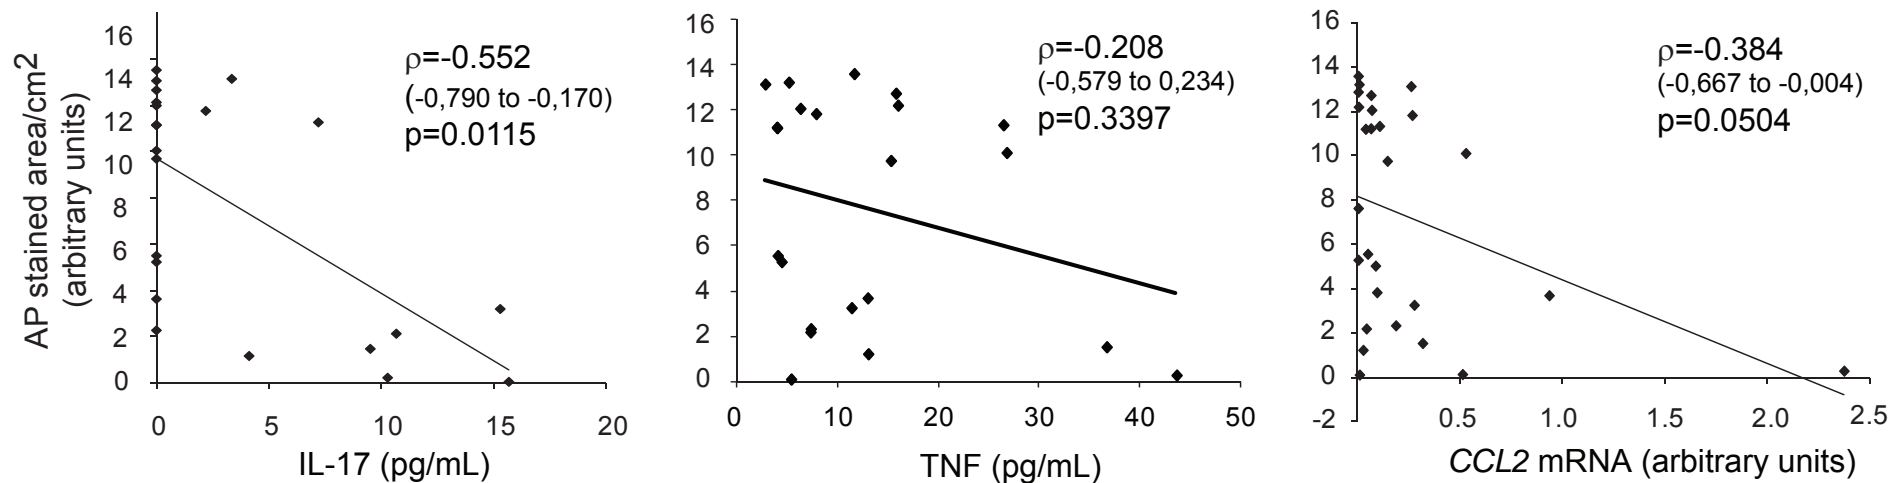

Supplement: MOESM4 [file 9694946]
